# **Comparison of manual and automated ventricle segmentation in the maternal immune stimulation rat model of schizophrenia**

Rebecca Winter<sup>¶</sup>, Benson Akinola<sup>¶</sup>, Elizabeth Barroeta-Hlusicka<sup>1</sup>, Sebastian Meister<sup>2</sup>, Jens Pietzsch<sup>2,3</sup>,  
Christine Winter<sup>4</sup>, Nadine Bernhardt<sup>1\*</sup>

<sup>1</sup>Department of Psychiatry and Psychotherapy, University Hospital Carl Gustav Carus, Technische Universität Dresden, Dresden, Germany

<sup>2</sup>Helmholtz-Zentrum Dresden-Rossendorf, Institute of Radiopharmaceutical Cancer Research, Department of Radiopharmaceutical and Chemical Biology, Dresden, Germany

<sup>3</sup>Technische Universität Dresden, School of Science, Faculty of Chemistry and Food Chemistry, Dresden, Germany

<sup>4</sup>Department of Psychiatry and Psychotherapy, Charité Universitätsmedizin Berlin, Berlin, Germany

\* Corresponding author

E-Mail: [nadine.bernhardt@uniklinikum-dresden.de](mailto:nadine.bernhardt@uniklinikum-dresden.de) (NB)

<sup>¶</sup>These authors contributed equally to this work.

## 1 **Abstract**

2 Maternal immune stimulation (MIS) is strongly implicated in the etiology of neuropsychiatric disorders.  
3 Magnetic resonance imaging (MRI) studies provide evidence for brain structural abnormalities in  
4 rodents following prenatal exposure to MIS. Reported volumetric changes in adult MIS offspring  
5 comprise among others larger ventricular volumes, consistent with alterations found in patients with  
6 schizophrenia. Linking rodent models of MIS with non-invasive small animal neuroimaging modalities  
7 thus represents a powerful tool for the investigation of structural endophenotypes. Traditionally manual  
8 segmentation of regions-of-interest, which is laborious and prone to low intra- and inter-rater reliability,  
9 was employed for data analysis. Recently automated analysis platforms in rodent disease models are  
10 emerging. However, none of these has been found to reliably detect ventricular volume changes in MIS  
11 nor directly compared manual and automated data analysis strategies. The present study was thus  
12 conducted to establish an automated, structural analysis method focused on lateral ventricle  
13 segmentation. It was applied to ex-vivo rat brain MRI scans. Performance was validated for phenotype  
14 induction following MIS and preventive treatment data and compared to manual segmentation. In  
15 conclusion, we present an automated analysis platform to investigate ventricular volume alterations in  
16 rodent models thereby encouraging their preclinical use in the search for new urgently needed  
17 treatments.

18

19 **Keywords:** small animal magnetic resonance imaging, lateral ventricle, maternal immune stimulation

20

## 21 **Introduction**

22 Exploring new avenues in psychiatric research has the goal of combining treatment effectiveness  
23 with tolerability, often with the idea of a preventive treatment strategy. One condition in order to achieve  
24 this high-set goal is the availability of cross-species biomarkers. Good parameters should be easily  
25 measured, reliably report disease manifestation in patients and inform preclinical treatment studies in  
26 disease relevant animal models. Discovering biomarkers has proven to be very challenging for many  
27 psychiatric diseases, due to the variability of symptoms and their often late onset. Most psychiatric  
28 diseases, like schizophrenia, are now considered neurodevelopmental, which means that the  
29 pathological alterations occur during development and are present before the symptoms develop. These  
30 pathological alterations can for example be seen in morphological changes in the brain, e.g. divergent  
31 volume of brain regions. One of these locations are the lateral ventricles, which are altered in a number  
32 of psychiatric or neurological afflictions: for example in ischemic stroke patients (1), amyotrophic  
33 lateral sclerosis (2), cystic periventricular leukomalacia (3), Alzheimer's disease (4), Parkinson's  
34 disease (5) and schizophrenia (6,7). Similar changes in lateral ventricle volumes have been observed in  
35 a number of established animal models with relevance to schizophrenia (8–10) as well as other  
36 psychiatric or neurological diseases (11–15).

37 Brain volumes can be easily measured with magnetic resonance imaging (MRI), a non-invasive  
38 imaging method available with a good soft-tissue contrast and good spatial resolution (50 - 100  $\mu\text{m}$ )  
39 (16,17). It utilizes longitudinal magnetization signals to create contrast images whose intensity range  
40 indicate structural boundaries and tissue properties in order to further make informed decisions. To  
41 quantify structural alterations due to neuropsychiatric diseases, MR images are acquired and  
42 morphometry is performed. Several morphometric methods have been established, including voxel  
43 based morphometry (VBM) (18) to correlate brain structure or shape differences within a population,  
44 cortical thickness measurement (19,20), statistical shape analysis (21) and structural volume analysis  
45 (22) with labeling of anatomical structures. For the process of morphometric analyzing the structural  
46 MR images for volume, shape and/or thickness, segmentation of the volume images is typically carried  
47 out. Segmentation is a process of classification of image units (pixels or voxels) into subsets based on

48 predefined criteria. The manual segmentation of the rodent's brain is often still the standard for  
49 segmentation of small animal structural images (23). This method is very laborious, time consuming  
50 and subjected to intra- and inter-subject variability. In the search of urgently needed new treatment  
51 strategies however, there is a high demand for reliable automated processing alternatives (24,25).

52 For automated morphometric analysis of the rodent brain it is important to accurately determine  
53 the anatomical structural region's parcellation. Any established method must be reliable and allow  
54 repetitiveness. A method that fits this need is the atlas-based segmentation. The automated atlas-based  
55 segmentation of volumetric images is based on image registrations and label propagation. It involves  
56 the registration (linear and diffeomorphic) between a reference brain image to individuals of a query set  
57 (or vice versa). The resulting registered brain represents the maximum similarity between the individual  
58 image and the corresponding reference image. The anatomical segmentation or label of the reference  
59 brain is further propagated to the individual brain sets based on the transformations and deformation  
60 fields from the registration step. Registration techniques, variation between animals' anatomical  
61 structures and correctness of label segmentation are critical factors for the automated segmentation of  
62 the rodent brain using an atlas-based technique. More recently, some more automated workflows have  
63 been implemented (26,27). These approaches are less labor-intensive and time-consuming; however,  
64 they cannot be directly applied to our data depending on differences between species (mouse vs rat),  
65 strains, gender or age factors. In addition, especially segmentation of lateral ventricles has been proven  
66 difficult (26).

67 Thus, we aimed to establish an automated analysis platform with a focus on lateral ventricle  
68 delineation. For this we chose a maternal immune stimulation (MIS) rat model for schizophrenia, which  
69 is based on the finding that maternal prenatal infection increases the risk of developing schizophrenia  
70 (Brown et al, 2004). Exposing pregnant rodents to the viral mimic polyriboinosinic polyribocytidilic  
71 acid (poly I:C) is a commonly used neurodevelopmental approach to model schizophrenia (8–10,28,29).  
72 The onset of behavioral abnormalities is seen during adolescence, similar to the clinical picture in  
73 humans (10). However, the neuropathological alterations have been detected at a different time point  
74 with the enlargement of lateral ventricles occurring in adulthood (30). This allows studies of preventive

75 treatment approaches. In line, we have previously reported that anodal transcranial direct current  
76 stimulation (tDCS) has been shown to prevent the emergence of behavioral alterations and the  
77 enlargement of lateral ventricles in the MIS animal model (8). Here, we report an analysis platform  
78 construction optimized for lateral ventricle volume estimation in adult male offspring following prenatal  
79 MIS induction. In addition, MR images were segmented manually and obtained results compared  
80 between methods. Finally, available imaging data from our prior tDCS treatment study was employed  
81 for verification of platform performance and data robustness.

## 82 **Materials and methods**

### 83 **Animals**

84 Experiments were performed according to the guidelines of the European Union Council  
85 Directive 2010/63/EU for care of laboratory animals approved by the local ethic committee  
86 (Landesdirektion Sachsen, Dresden, Germany). Animals were housed in a temperature and humidity-  
87 controlled vivarium under a 12 h light / 12 h dark standard day cycle with food and water ad libitum.  
88 Animal suffering and numbers were kept to a minimum. Female pregnant Wistar rats (Charles River  
89 Laboratories, Europe) were received at gestational day (GD) 15, housed in individual cages with nesting  
90 material and left to acclimatize for 2 hours. Dams were carefully anesthetized with isoflurane and the  
91 viral analogue poly I:C, (4 mg/kg; Sigma, Germany) dissolved in saline, or 0.9% saline alone was  
92 injected through the tail vein (volume: 100  $\mu$ l/100 gr bodyweight) (31,32). Dams were weighed daily  
93 until delivery and then left undisturbed until postnatal day (PND) 21, when offspring was weaned,  
94 group-housed with 2-4 animals in standard cages with bedding and shelter (dark PVC tubes). Adult  
95 (>PND90) male offspring, n=21 from saline and n=20 from poly I:C injected mothers, were used for the  
96 study.

97 Second, imaging data from a previous published study (8) was utilized. The study was  
98 conducted to assess the preventive treatment potential of non-invasive transcranial direct current  
99 stimulation (tDCS) during adolescence, prior to schizophrenia-relevant behavioral manifestation, in the  
100 same MIS model of schizophrenia. The study followed a 2  $\times$  3 design with phenotype (saline, poly)  $\times$

101 treatment (sham, cathodal, anodal), for details refer to Hadar et al., 2019. Groups: saline-sham (ss) n =  
102 15, poly-sham (ps) n = 14, saline-cathodal (sc) n = 13, poly-cathodal (pc) n = 11, saline-anodal (sa) n =  
103 11 and poly-anodal (pa) n = 12.

## 104 **MRI**

### 105 **Sample preparation**

106 For postmortem assessments the rats were deeply anaesthetized with a single i.p. injection of  
107 pentobarbital (60 mg/kg) and perfused transcardially with cold 4% paraformaldehyde in 0.1 M  
108 phosphate buffer, pH 7.4. Brains remained within the skull and were imaged within 1-2 weeks following  
109 preparation.

### 110 **Acquisition**

111 MRI acquisitions were performed on a 7 Tesla rodent scanner (Bruker BioSpin MRI GmbH,  
112 Ettlingen, Germany) at Charité (Berlin, Germany) or HZDR (Dresden-Rossendorf, Germany). The  
113 acquisition protocol consisted of a multi slice localizer (field of view (FOV) 50 × 50 mm) and T2-  
114 weighted contrast images with a rapid acquisition with relaxation enhancement (RARE) sequence  
115 (imaging parameters: TR/TE = 4050/30 ms, RARE factor 8, NEX 6, FOV 30 × 30 mm, MD 256 × 256),  
116 resulting in an inplane resolution of 117  $\mu\text{m}$  with a slice thickness of 0.5 mm and 42 slices. Scanning  
117 time was 13 minutes per brain.

### 118 **Manual segmentation**

119 The axial view was used for manual segmentation. Original acquired images were resliced with  
120 a slice thickness of 0.12 mm. 15 slices from -0.1mm (first view of the anterior part of the anterior  
121 commissure) to +0.7mm from Bregma were analyzed for each animal (33). For best image quality,  
122 contrast was adjusted using MRICron. The lateral ventricles were outlined using ImageJ and special  
123 attention was paid on distinguishing ventricular area from adjoining areas through identifying  
124 differences in contrast by eye. Manual segmentation took up to 120 minutes per animal, as both left and  
125 right lateral ventricle were separately measured through each slice and discernable contrasts were often  
126 minimal, which required extensive repeated examination. Two independent raters carried out manual

127 segmentation. Volumes were obtained by multiplying the summed-up amount of pixels times pixel area  
128 with slice thickness (ventricular volume = (sum (measured amount of pixels  $\times$  0.117mm<sup>2</sup>))  $\times$  0.12mm  $\times$   
129 0.01). Analysis were run on means from the two independent observations per animal.

### 130 **Automated analysis platform**

131 The DICOM (Digital Imaging and Communications in Medicine) MR image data were  
132 collected, converted into the Neuroimaging Informatics Technology Initiative (NIFTI) file format and  
133 utilized for the platform's framework and evaluation. To provide computational efficiency the automated  
134 analysis platform was based on the Advanced Normalization Tools (ANTs) (34), a toolkit for medical  
135 image registration and segmentation and was implemented with a high-performance computing (HPC)  
136 setup (see S1 Appendix for details). The structure of the automated analysis platform is shown in Fig 1.

137

138 **Fig 1. Automated analysis platform overview** (a) Flowchart with examples of b) bias correction  
139 including intensity normalisation followed by field correction for inhomogeneity using the  
140 N4BiasFieldCorrection (64). c) Brain extraction with registration-based skull stripping to remove non  
141 brain tissues using a mask and the skullstripper tool (65). d) Atlas Creation: Iterative creation of the  
142 within study template using the minimum deformation pairwise registration resulted in a study template,  
143 an averaged image of selected control subjects d' with its corresponding manually delineated labels and  
144 d'' regions of interest (ROI) for studies in the maternal immune activation model.

145

146 Pre-processing steps included intensity reorientation, intensity bias correction and brain  
147 extraction. To achieve spatial consistency images were reoriented into standard anatomical space  
148 (patient coordinate) based on the ITK-SNAP (35) employing the *orient* algorithm of the *Convert3D*  
149 medical image processing tool. Hence data sets with an initial orientation LPI (Left, Posterior, Inferior),  
150 common for DICOM images i.e. an image vector were converted by a linear transformation to RIP  
151 (Right, Inferior, Posterior).

152 The N4BiasFieldCorrection algorithm (N4ITK), an optimized version of the N3 that  
153 implements a robust B-spline approximation routine and a modified optimization scheme (36), was used

154 to correct intensity non-uniformity within images. 50 iterations over three levels with a convergence  
155 threshold of 1e-6, full width at half maximum (deconvolution kernel) of 0.15mm were employed with  
156 default parameters to provide optimum results for the rat subject MR images. For brain extraction the  
157 python command line *SkullStrip* (37) was used for the semi-automated registration brain extraction in this  
158 project. A reference stripped image with its brain mask (manually delineated) and the brain image was  
159 used to generate a stripped fixed image mask that was then binarized. Image multiplication operation  
160 was then performed with this mask and the original subject image (see S1 Appendix for details).

161 Post-processing steps included the segmentation of each subject, i.e. the image registration,  
162 normalization, label propagation and volume extraction. For the segmentation of each subject the atlas-  
163 based method was implemented using a within study created atlas from four control subjects (38). The  
164 *antsMultivariateTemplateConstruction.sh* script(39) of the ANTs tool was utilized for template creation.  
165 An iteration of four was employed with the greedy symmetric normalization (SyN) transformation with  
166 a cross correlation similarity metric (39,40). The anatomical image of the template was manually  
167 delineated into thirty-five regions using the ITK-SNAP. The standard rat brain atlas (33) was employed  
168 for anatomical referencing and nomenclature. The left and right hemispheres were considered as one  
169 unit. The ependymal and subependymal layers were considered the boundaries of the lateral ventricles  
170 (LV). Similarly, the periventricular hypothalamic region was classified with the 3rd ventricles.

171 The *antsRegistration* command (41) of the ANTs was employed for image registration. The  
172 cross-correlation (CC) similarity metric was used for diffeomorphic registration and the mutual  
173 information during linear registration (26,39,42) between the fixed and moving images. The symmetric  
174 normalization (SyN) (42) was the optimizer (image normalization method) algorithm used during  
175 deformation with the CC similarity (39). The *antsApplyTransforms* command of the ANTs tool was  
176 employed for label propagation of all subjects with a nearest neighbor interpolation scheme. From the  
177 automated segmentation description using an atlas-based segmentation technique, the quality of  
178 segmentation of the output is directly proportional to the performance of registration (43) and  
179 interpolation scheme (see S1 Appendix for details). The volume of each structure of the label was  
180 extracted using the *LabelStats* algorithm of ANTs and a MATLAB script.



## 181 **Statistics**

182 One way ANOVA was used to determine significant differences between phenotype (saline or  
183 poly) for the lateral ventricle volumes measured through manual segmentation and the automated  
184 analysis platform, respectively. To check for significant interactions between phenotype (saline or poly)  
185 and treatment (saline, anodal or cathodal), two-way ANOVA was completed followed by posthoc  
186 analysis with Sidak correction. Statistical significance was set at  $p < 0.05$ . The software SPSS was used  
187 for statistical analysis of the data.

## 188 **Results**

189 MR images from 42 animals (n=21 saline, n=20 poly) were analyzed using the established  
190 analysis platform, labels were visually quality controlled but not corrected and ventricular volumes  
191 estimated. As expected, estimates were observed to be lower in saline  $4.198 \pm 0.247 \text{ mm}^3$  compared to  
192 poly I:C  $4.434 \pm 0.279 \text{ mm}^3$  offspring, respectively (Fig. 2a,b). The difference was found to be  
193 significant  $T(39) = -2.858$   $p = .007$  (Fig 2c). Due to the enormous labor intensity only half of the sample  
194 was also evaluated manually (n=12 saline, n=12 poly; for example of manual segmented image see S1  
195 Appendix). Analysis showed similarly lower estimations of LV volumes with  $3.981 \pm 0.463 \text{ mm}^3$  and  
196  $4.293 \pm 0.383 \text{ mm}^3$  in saline compared to poly I:C offspring which did not reach significance  $T(22) = -$   
197  $1.794$   $p = .087$  (Fig. 2d). Reduced samples size and variance between samples in manual estimates,  
198 which is two times higher compared to platform measures, can be taken in consideration, however  
199 automated analysis platform data from an identically reduced sample remains significant  $T(22) = -2.481$   
200  $p = .023$ . Thus both evaluation methods yield similar phenotype differences while the correlation  
201 between measures is small  $r(22) = .249$ ,  $p = .032$ .

202

203 **Fig 2. Lateral ventricle (LV) phenotype in rat MIS model.** a,b) Examples of LV delineated from a  
204 saline a) and poly (b) subject by the automated analysis platform. Boxplot of the lateral ventricular  
205 volume from poly I:C and saline injected offspring following c) automated and d) manual delineation  
206 methods. Center lines show the medians; box limits indicate the 25th and 75th percentiles as determined

207 by R software; whiskers extend 1.5 times the interquartile range from the 25th and 75th percentiles,  
208 individual data points included.

209

210 For further performance validation, imaging data from (8), which was published employing  
211 manual delineation, was now re-analyzed with the newly established automated analysis platform.  
212 Following visual quality control, ventricle labels were manually corrected for 15% of subjects and LV  
213 volume statistics obtained (Fig. 3). A two way ANOVA yielded a significant effect for the  
214 phenotype\*treatment interaction ( $F(5,68) = 8.626$ ,  $p < .001$ ) with no main effects of phenotype or  
215 treatment ( $p > .05$ ). Posthoc analysis showed the expected, significant phenotype difference following  
216 MIS between the saline control (ss) and the untreated poly I:C (ps) group  $p = .002$ , mean ventricular  
217 volume ss:  $3.97 \pm 0.25 \text{ mm}^3$  and ps:  $4.28 \pm 0.21 \text{ mm}^3$ . Similarly, as measured and statistically evaluated  
218 in the Hadar et al., 2019 paper, treatment was found to reduce LV volume following MIS when  
219 compared to ps animals for cathodal  $p = .004$  and anodal  $p = .006$  stimulation, respectively. Mean  
220 ventricular volume for pc:  $3.98 \pm 0.18 \text{ mm}^3$  and pa:  $4.00 \pm 0.30 \text{ mm}^3$  groups. Finally, also differences  
221 between sa and pa were replicated  $p = .037$ , mean ventricular volume for sa:  $4.2 \pm 0.09 \text{ mm}^3$ .

222

223 **Fig. 3 Performance evaluation on treatment data.** Lateral ventricle volume estimation in rat MIS  
224 model from a study of preventive treatment with transcranial direct current stimulation (8) shows  
225 validation of prior reported findings using automated platform method. Center lines show the medians;  
226 box limits indicate the 25th and 75th percentiles as determined by R software; whiskers extend 1.5 times  
227 the interquartile range from the 25th and 75th percentiles, individual data points included.

228

## 229 Discussion

230 The present work describes the implementation of a single atlas-based segmentation framework  
231 for adult rat brain analysis, optimized for lateral ventricle segmentation. Volume estimation with this  
232 automated framework was validated against the results of a standard manual method. The output of the

233 analysis platform was further used to estimate volumetric changes caused by neuropsychiatric disease  
234 and the potential therapeutic treatments in the MIS rat model of schizophrenia on ex-vivo MRI data.

235 The enlargement of the lateral ventricles is consistently observed in patients with schizophrenia  
236 and relevant established animal models. Such alterations are thought to originate from abnormal prenatal  
237 brain development. This association has been especially well documented through the study of rodents  
238 following prenatal MIS. Notably, this phenotype difference was observed in both of our independent  
239 sample analysis, and with both manual and automated analysis.

240 In schizophrenia patients further structural brain abnormalities have been detected in in a  
241 number of brain regions such as the striatum (44,45), the hippocampus and other medial temporal lobe  
242 structures (44,46,47), as well as the cerebellum (48–50), and progressive gray matter (GM) loss is  
243 present in parietal, prefrontal and superior temporal cortices (51–54). While we have not investigated  
244 this further, recent semi-automated segmentation methods have already shown promising results in  
245 estimating changes in striatal, hippocampal and cortical structures in rodent models (Crum et al., 2017).

246 The use of rodent models in general provides an advantage for the evaluation of temporal  
247 changes in disease and repeatability at a systemic level. Animals of different strains combined with  
248 several imaging techniques can provide insight regarding behavioral pharmacology, potential therapies,  
249 longitudinal studies of diseases in order to measure changes, treatment efficacy and other therapeutic  
250 interventions (17,55). Therefore, our results further strengthen the growing field of neuroimaging  
251 techniques in preclinical animal research, for which investigations and deductions can be translated  
252 towards the respective human conditions (56,57).

253 Our analysis included ex-vivo MRI data from a study of tDCS application to prevent  
254 manifestation of schizophrenia associated deficits in MIA rats (8). tDCS is a brain stimulation method  
255 where low electric positive (anodal) or negative (cathodal) current is applied to an area of the brain for  
256 the depolarization or hyperpolarization of neurons towards facilitatory or inhibitory behavioral effects  
257 respectively (58). Medial prefrontal cortex (mPFC) stimulation, based on established protocols (59) and  
258 applied during adolescence, was reported to restrict the emergence of schizophrenia-related behaviors  
259 as well as volumetric changes. The previously, manually segmented data sets were now reanalyzed to

260 confirm phenotype and treatment effects at adulthood. We were able to replicate the results with our  
261 automated analysis platform, showing a significant difference in lateral ventricle volumes with lower  
262 volumes in saline offspring compared to poly I:C offspring. In addition, the automated analysis platform  
263 confirmed lower lateral ventricle sizes for poly I:C offspring treated with anodal stimulation but not for  
264 poly I:C offspring treated with cathodal stimulation.

265 Manual segmentation is still frequently used to achieve volumetric measures from neuroimaging  
266 techniques due to its robustness, although it has certain disadvantages. It is very time consuming, taking  
267 2-3 hours per animal for a practiced expert, and therefore labor-intensive. Variance in the results is high,  
268 with inter- and intra-rater biases, and the need for a better alternative is formidable. The automated  
269 method as shown in this paper is accurate, allows repetitiveness and is much less time-consuming.  
270 However, automated segmentation still comes with various challenges. They include often low image  
271 resolution of rodent brains (smaller voxel sizes in rodents compared to humans due to their brain size),  
272 physiological noise and signal-to-noise ratio (57,60). However, animal MRI scanners have higher field  
273 strengths (7 - 16.4 T) than human scanners (1.5, 3T), providing better contrasts to distinguish brain  
274 structures. The quality of MR image contrast influences the quality of extraction, introducing a bias by  
275 raters during delineation for low quality images. It should be noted that for well contrasted images, MRI  
276 acquisition requires a longer scanning time and large image outputs influence calculations during image  
277 analysis. Alternatively, image contrast agents can be used during scanning to enhance the quality of  
278 images while compensating for scanning time (60,61).

279 In addition, segmentation of small regions of interest can be faulted by introducing a systematic  
280 bias, which increases as the region of interest gets smaller (26,62). This has been noted especially for  
281 the case of lateral ventricle segmentation. It has also been noted to apply even more so when earlier  
282 timepoints are investigated as the brains and corresponding ROIs are much smaller. This systematic bias  
283 is inherent in automated segmentation, demanding a critical and cautious adjustment of automated  
284 processes to the data at hand. Several steps have been taken in the development of this analysis platform  
285 and the preparation of data to reduce a potential systematic bias. In the used registration method, a brain  
286 atlas with its corresponding brain mask is used for brain extraction. Therefore, the brain extraction is

287 dependent on the availability of an atlas, its mask and the parameters of registration. The rats' size, age  
288 and the similarity between the reference atlas image and the target image of the dataset must be  
289 considered. To aid this, a reference subject can be chosen from the study cohort, manually segmented  
290 and used for the automated registration brain extraction methods. In our approach, the *SkullStrip* (37)  
291 command tool, a robust automated brain extraction tool, was used, which is dependent on the image  
292 resolution. This tool was further optimized by binarizing the skull stripped output for each subject and  
293 applying it to the original image to get the best "brain-only" volume image for each subject. These  
294 additional steps resulted in a higher correlation in visual inspection, total brain volume and similarity  
295 measure to the manual method. These efforts may be partially responsible for achieving results in line  
296 with previous work on characterizing volumetric changes in lateral ventricles with the presented  
297 platform contrary to the findings of other semi-automated segmentation approaches (26).

298         Limitations of the presented analysis platform include the still labor-intensive manual extracting  
299 of the reference subject and its brain mask used with the optimized skull-strip method. This step, though  
300 advisable to remove bias resulting from differences in strain and age when needed, is only carried out  
301 once. A within-study template is highly recommended. Second the image contrast, significant for brain  
302 segmentation was low in our data. There is a need for a standard segmentation protocol detailing the  
303 process to delineate rodent brains for imaging modalities other than histology. Anderson et al. (63)  
304 described a validation of registration parameter choices using high-performance computer clusters. They  
305 indicated the computational cost-benefits and temporal performance with a voxel-based analysis. With  
306 several images to be analyzed in preclinical studies and the differences observed in between registration  
307 metrics there is still a strong need for a comprehensive evaluation framework to inform or guide  
308 parameter choices in rodent image analysis. Finally, this automated analysis platform was optimized  
309 only for the segmentation of ventricular volumes. Label propagation utilizes the transformation matrix  
310 and output of the registration, so multiple labels can be propagated to measure changes in the individual  
311 subject. These labels can contain different numbers of structures as well. In the future the presented  
312 analysis platform should thus be extended to the measurement of other clinically relevant brain  
313 alterations in rodent models.

## 314 **Conclusion**

315           The characterization of preclinical rodent models of neurological and psychiatric diseases with  
316 several imaging modalities is challenging with an increased need for accuracy, reputability, efficiency  
317 and reduced human effort except for quality control in the studies. This project thus focused on  
318 implementing an automated single atlas-based segmentation framework for rat brains and validate its  
319 performance against the results of the standard manual method. The analysis platform integrated several  
320 pre-processing and post-processing steps including brain extraction, intensity non-uniformity bias  
321 correction, linear and non-linear registrations and label propagation. The resulting analysis platform was  
322 used exemplarily with ex-vivo MR images of a MIS schizophrenia rat model. It successfully detected  
323 lateral ventricle volumetric changes for phenotypes in independent samples and following treatments,  
324 establishing a basis for utilizing anatomical biomarkers in the rat to investigate disease progression or  
325 treatment efficiency.

## 326 **Acknowledgements**

327 We thank Kristin Wogan for excellent technical assistance and Susanne Müller for profound support  
328 on MRI studies. Also the authors gratefully acknowledge the GWK support for funding this project by  
329 providing computing time through the Center for Information Services and HPC (ZIH) at TU Dresden  
330 on the HRSK-II.

## 331 **References**

- 332 1. Yoo AJ, Sheth KN, Kimberly WT, Chaudhry ZA, Elm JJ, Jacobson S, et al. Validating Imaging  
333 Biomarkers of Cerebral Edema in Patients With Severe Ischemic Stroke. *Journal of Stroke and*  
334 *Cerebrovascular Diseases*. 2013 Aug;22(6):742–9.
- 335 2. Westeneng H-J, Verstraete E, Walhout R, Schmidt R, Hendrikse J, Veldink JH, et al. Subcortical  
336 structures in amyotrophic lateral sclerosis. *Neurobiology of Aging*. 2015 Feb 1;36(2):1075–82.
- 337 3. Kato A, Ibara S, Maruyama Y, Terahara M. Relationship between enlargement of the lateral  
338 ventricle and periventricular leukomalacia in infants. *Journal of Obstetrics and Gynaecology*  
339 *Research*. 2010;36(5):984–90.
- 340 4. Nestor SM, Rupsingh R, Borrie M, Smith M, Accomazzi V, Wells JL, et al. Ventricular  
341 enlargement as a possible measure of Alzheimer’s disease progression validated using the  
342 Alzheimer’s disease neuroimaging initiative database. *Brain*. 2008 Sep;131(9):2443–54.
- 343 5. Lewis MM, Smith AB, Styner M, Gu H, Poole R, Zhu Hongtu, et al. Asymmetrical lateral  
344 ventricular enlargement in Parkinson’s disease. *Eur J Neurol*. 2009 Apr;16(4):475–81.
- 345 6. van Erp TGM, Hibar DP, Rasmussen JM, Glahn DC, Pearlson GD, Andreassen OA, et al.  
346 Subcortical brain volume abnormalities in 2028 individuals with schizophrenia and 2540 healthy  
347 controls via the ENIGMA consortium. *Mol Psychiatry*. 2016 Apr;21(4):547–53.
- 348 7. Mata I, Perez-Iglesias R, Roiz-Santiañez R, Tordesillas-Gutierrez D, Gonzalez-Mandly A, Berja  
349 A, et al. Additive effect of NRG1 and DISC1 genes on lateral ventricle enlargement in first episode  
350 schizophrenia. *NeuroImage*. 2010 Nov 15;53(3):1016–22.
- 351 8. Hadar R, Winter R, Edemann-Callesen H, Wieske F, Habelt B, Khadka N, et al. Prevention of  
352 schizophrenia deficits via non-invasive adolescent frontal cortex stimulation in rats. *Molecular*  
353 *Psychiatry*. 2019 Jan 28;1.
- 354 9. Fatemi SH, Reutiman TJ, Folsom TD, Huang H, Oishi K, Mori S, et al. Maternal infection leads  
355 to abnormal gene regulation and brain atrophy in mouse offspring: Implications for genesis of  
356 neurodevelopmental disorders. *Schizophrenia Research*. 2008 Feb;99(1–3):56–70.
- 357 10. Piontkewitz Y, Arad M, Weiner I. Abnormal Trajectories of Neurodevelopment and Behavior  
358 Following In Utero Insult in the Rat. *Biological Psychiatry*. 2011 Nov;70(9):842–51.
- 359 11. Segal Y, Segal L, Blumenfeld-Katzir T, Sasson E, Poliansky V, Loeb E, et al. The Effect of  
360 Electromagnetic Field Treatment on Recovery from Ischemic Stroke in a Rat Stroke Model:

- 361 Clinical, Imaging, and Pathological Findings. *Stroke Res Treat* [Internet]. 2016 [cited 2019 Jun  
362 3];2016. Available from: <https://www.ncbi.nlm.nih.gov/pmc/articles/PMC4753339/>
- 363 12. Bataveljić D, Djogo N, Župunski L, Bajić A, Nicaise C, Pochet R, et al. Live monitoring of brain  
364 damage in the rat model of amyotrophic lateral sclerosis. :7.
- 365 13. Andjus PR, Bataveljić D, Vanhoutte G, Mitrecic D, Pizzolante F, Djogo N, et al. In Vivo  
366 Morphological Changes in Animal Models of Amyotrophic Lateral Sclerosis and Alzheimer's-  
367 Like Disease: MRI Approach. *The Anatomical Record*. 2009;292(12):1882–92.
- 368 14. Descloux C, Ginet V, Rummel C, Truttmann AC, Puyal J. Enhanced autophagy contributes to  
369 excitotoxic lesions in a rat model of preterm brain injury. *Cell Death Dis* [Internet]. 2018 Aug 28  
370 [cited 2019 Jun 3];9(9). Available from:  
371 <https://www.ncbi.nlm.nih.gov/pmc/articles/PMC6113308/>
- 372 15. Vernon AC, Crum WR, Johansson SM, Modo M. Evolution of Extra-Nigral Damage Predicts  
373 Behavioural Deficits in a Rat Proteasome Inhibitor Model of Parkinson's Disease. *PLoS One*  
374 [Internet]. 2011 Feb 25 [cited 2019 Jun 3];6(2). Available from:  
375 <https://www.ncbi.nlm.nih.gov/pmc/articles/PMC3045435/>
- 376 16. Finlay CJ, Duty S, Vernon AC. Brain Morphometry and the Neurobiology of Levodopa-Induced  
377 Dyskinesias: Current Knowledge and Future Potential for Translational Pre-Clinical  
378 Neuroimaging Studies. *Front Neurol* [Internet]. 2014 Jun 12 [cited 2020 Mar 31];5. Available  
379 from: <https://www.ncbi.nlm.nih.gov/pmc/articles/PMC4053925/>
- 380 17. Strome EM, Doudet DJ. Animal models of neurodegenerative disease: insights from in vivo  
381 imaging studies. *Mol Imaging Biol*. 2007 Aug;9(4):186–95.
- 382 18. Ashburner J, Friston KJ. Voxel-Based Morphometry—The Methods. *NeuroImage*. 2000 Jun  
383 1;11(6):805–21.
- 384 19. Clarkson MJ, Cardoso MJ, Ridgway GR, Modat M, Leung KK, Rohrer JD, et al. A comparison of  
385 voxel and surface based cortical thickness estimation methods. *NeuroImage*. 2011 Aug  
386 1;57(3):856–65.
- 387 20. Das SR, Avants BB, Grossman M, Gee JC. Registration based cortical thickness measurement.  
388 *NeuroImage*. 2009 Apr 15;45(3):867–79.
- 389 21. Shen K, Fripp J, Mériaudeau F, Chételat G, Salvado O, Bourgeat P. Detecting global and local  
390 hippocampal shape changes in Alzheimer's disease using statistical shape models. *NeuroImage*.  
391 2012 Feb 1;59(3):2155–66.
- 392 22. Budin F, Hoogstoel M, Reynolds P, Grauer M, O'Leary-Moore SK, Oguz I. Fully automated  
393 rodent brain MR image processing pipeline on a Midas server: from acquired images to region-  
394 based statistics. *Frontiers in Neuroinformatics* [Internet]. 2013 [cited 2019 Nov 18];7. Available  
395 from: <http://journal.frontiersin.org/article/10.3389/fninf.2013.00015/abstract>
- 396 23. Ma Y, Smith D, Hof PR, Foerster B, Hamilton S, Blackband SJ, et al. In Vivo 3D Digital Atlas  
397 Database of the Adult C57BL/6J Mouse Brain by Magnetic Resonance Microscopy. *Front*  
398 *Neuroanat* [Internet]. 2008 Apr 17 [cited 2020 Mar 31];2. Available from:  
399 <https://www.ncbi.nlm.nih.gov/pmc/articles/PMC2525925/>



- 400 24. Jorge Cardoso M, Leung K, Modat M, Keihaninejad S, Cash D, Barnes J, et al. STEPS: Similarity  
401 and Truth Estimation for Propagated Segmentations and its application to hippocampal  
402 segmentation and brain parcellation. *Medical Image Analysis*. 2013 Aug 1;17(6):671–84.
- 403 25. Nestor SM, Gibson E, Gao F-Q, Kiss A, Black SE. A Direct Morphometric Comparison of Five  
404 Labeling Protocols for Multi-Atlas Driven Automatic Segmentation of the Hippocampus in  
405 Alzheimer’s Disease. *Neuroimage*. 2013 Feb 1;0:50–70.
- 406 26. Crum WR, Sawiak SJ, Chege W, Cooper JD, Williams SCR, Vernon AC. Evolution of structural  
407 abnormalities in the rat brain following in utero exposure to maternal immune activation: A  
408 longitudinal in vivo MRI study. *Brain Behav Immun*. 2017 Jul;63:50–9.
- 409 27. Norris FC, Modat M, Cleary JO, Price AN, McCue K, Scambler PJ, et al. Segmentation  
410 propagation using a 3D embryo atlas for high-throughput MRI phenotyping: Comparison and  
411 validation with manual segmentation. *Magnetic Resonance in Medicine*. 2013;69(3):877–83.
- 412 28. Meyer U, Feldon J, Schedlowski M, Yee BK. Towards an immuno-precipitated  
413 neurodevelopmental animal model of schizophrenia. *Neuroscience & Biobehavioral Reviews*.  
414 2005 Jan;29(6):913–47.
- 415 29. Meyer U, Feldon J, Dammann O. Schizophrenia and Autism: Both Shared and Disorder-Specific  
416 Pathogenesis Via Perinatal Inflammation?: *Pediatric Research*. 2011 May;69(5 Part 2):26R–33R.
- 417 30. Piontkewitz Y, Assaf Y, Weiner I. Clozapine Administration in Adolescence Prevents  
418 Postpubertal Emergence of Brain Structural Pathology in an Animal Model of Schizophrenia.  
419 *Biological Psychiatry*. 2009 Dec 1;66(11):1038–46.
- 420 31. Hadar R, Soto-Montenegro ML, Götz T, Wieske F, Sohr R, Desco M, et al. Using a maternal  
421 immune stimulation model of schizophrenia to study behavioral and neurobiological alterations  
422 over the developmental course. *Schizophrenia Research*. 2015 Aug 1;166(1):238–47.
- 423 32. Zuckerman L, Rehavi M, Nachman R, Weiner I. Immune Activation During Pregnancy in Rats  
424 Leads to a PostPubertal Emergence of Disrupted Latent Inhibition, Dopaminergic Hyperfunction  
425 and Altered Limbic Morphology in the Offspring: A Novel Neurodevelopmental Model of  
426 Schizophrenia. *Neuropsychopharmacology*. 2003 Oct;28(10):1778–89.
- 427 33. Paxinos G, Watson C. *The rat brain in stereotaxic coordinates*. 6th ed. Amsterdam ; Boston:  
428 Academic Press/Elsevier; 2007. 1 p.
- 429 34. Ma D, Cardoso MJ, Modat M, Powell N, Wells J, Holmes H, et al. Automatic Structural  
430 Parcellation of Mouse Brain MRI Using Multi-Atlas Label Fusion. *PLOS ONE*. 2014 Jan  
431 27;9(1):e86576.
- 432 35. Badea A, Ali-Sharief AA, Johnson GA. Morphometric analysis of the C57BL/6J mouse brain.  
433 *NeuroImage*. 2007 Sep 1;37(3):683–93.
- 434 36. Sled JG, Zijdenbos AP, Evans AC. A nonparametric method for automatic correction of intensity  
435 nonuniformity in MRI data. *IEEE Trans Med Imaging*. 1998 Feb;17(1):87–97.
- 436 37. Boyes RG, Gunter JL, Frost C, Janke AL, Yeatman T, Hill DLG, et al. Intensity non-uniformity  
437 correction using N3 on 3-T scanners with multichannel phased array coils. *Neuroimage*. 2008 Feb  
438 15;39(4):1752–62.

- 439 38. Kochunov P, Lancaster JL, Thompson P, Woods R, Mazziotta J, Hardies J, et al. Regional spatial  
440 normalization: toward an optimal target. *J Comput Assist Tomogr*. 2001 Oct;25(5):805–16.
- 441 39. Kovacević N, Henderson JT, Chan E, Lifshitz N, Bishop J, Evans AC, et al. A three-dimensional  
442 MRI atlas of the mouse brain with estimates of the average and variability. *Cereb Cortex*. 2005  
443 May;15(5):639–45.
- 444 40. Benveniste H, Blackband S. MR microscopy and high resolution small animal MRI: applications  
445 in neuroscience research. *Prog Neurobiol*. 2002 Aug;67(5):393–420.
- 446 41. Lee J, Jomier J, Aylward S, Tyszka M, Moy S, Lauder J, et al. Evaluation of Atlas based Mouse  
447 Brain Segmentation. *Proc SPIE*. 2009 Feb 1;7259:725943–9.
- 448 42. Ochsner KN, Beer JS, Robertson ER, Cooper JC, Gabrieli JDE, Kihlstrom JF, et al. The neural  
449 correlates of direct and reflected self-knowledge. *Neuroimage*. 2005 Dec;28(4):797–814.
- 450 43. Fujiwara H, Yassin W, Murai T. Neuroimaging studies of social cognition in schizophrenia.  
451 *Psychiatry and Clinical Neurosciences*. 2015;69(5):259–67.
- 452 44. Bogerts B, Meertz E, Schönfeldt-Bausch R. Basal ganglia and limbic system pathology in  
453 schizophrenia. A morphometric study of brain volume and shrinkage. *Arch Gen Psychiatry*. 1985  
454 Aug;42(8):784–91.
- 455 45. Buchabaum MS. Frontal Lobes, Basal Ganglia, Temporal Lobes—Three Sites for Schizophrenia?  
456 *Schizophr Bull*. 1990 Jan 1;16(3):377–8.
- 457 46. Benes FM, Sorensen I, Bird ED. Reduced Neuronal Size in Posterior Hippocampus of  
458 Schizophrenic Patients. *Schizophrenia Bulletin*. 1991 Jan 1;17(4):597–608.
- 459 47. Nelson MD, Saykin AJ, Flashman LA, Riordan HJ. Hippocampal volume reduction in  
460 schizophrenia as assessed by magnetic resonance imaging: a meta-analytic study. *Arch Gen  
461 Psychiatry*. 1998 May;55(5):433–40.
- 462 48. DeLisi LE, Sakuma M, Tew W, Kushner M, Hoff AL, Grimson R. Schizophrenia as a chronic  
463 active brain process: a study of progressive brain structural change subsequent to the onset of  
464 schizophrenia. *Psychiatry Res*. 1997 Jul 4;74(3):129–40.
- 465 49. Volz H-P, Gaser C, Sauer H. Supporting evidence for the model of cognitive dysmetria in  
466 schizophrenia — a structural magnetic resonance imaging study using deformation-based  
467 morphometry. *Schizophrenia Research*. 2000 Nov 30;46(1):45–56.
- 468 50. Ichimiya T, Okubo Y, Suhara T, Sudo Y. Reduced volume of the cerebellar vermis in neuroleptic-  
469 naive schizophrenia. *Biological Psychiatry*. 2001 Jan 1;49(1):20–7.
- 470 51. Kuperberg GR, Broome MR, McGuire PK, David AS, Eddy M, Ozawa F, et al. Regionally  
471 localized thinning of the cerebral cortex in schizophrenia. *Arch Gen Psychiatry*. 2003  
472 Sep;60(9):878–88.
- 473 52. White T, Andreasen NC, Nopoulos P, Magnotta V. Gyrfication abnormalities in childhood- and  
474 adolescent-onset schizophrenia. *Biol Psychiatry*. 2003 Aug 15;54(4):418–26.
- 475 53. Wiegand LC, Warfield SK, Levitt JJ, Hirayasu Y, Salisbury DF, Heckers S, et al. Prefrontal  
476 Cortical Thickness in First-Episode Psychosis: A Magnetic Resonance Imaging Study. *Biol  
477 Psychiatry*. 2004 Jan 15;55(2):131–40.

- 478 54. Narr KL, Bilder RM, Toga AW, Woods RP, Rex DE, Szeszko PR, et al. Mapping cortical  
479 thickness and gray matter concentration in first episode schizophrenia. *Cereb Cortex*. 2005  
480 Jun;15(6):708–19.
- 481 55. Borsook D, Becerra L. CNS Animal fMRI imaging in Pain and Analgesia. *Neurosci Biobehav*  
482 *Rev*. 2011 Apr;35(5):1125–43.
- 483 56. McIntosh AL, Gormley S, Tozzi L, Frodl T, Harkin A. Recent Advances in Translational Magnetic  
484 Resonance Imaging in Animal Models of Stress and Depression. *Front Cell Neurosci* [Internet].  
485 2017 May 24 [cited 2020 Mar 31];11. Available from:  
486 <https://www.ncbi.nlm.nih.gov/pmc/articles/PMC5442179/>
- 487 57. Kalavathi P, Prasath VBS. Methods on Skull Stripping of MRI Head Scan Images—a Review. *J*  
488 *Digit Imaging*. 2016 Jun;29(3):365–79.
- 489 58. Nitsche MA, Cohen LG, Wassermann EM, Priori A, Lang N, Antal A, et al. Transcranial direct  
490 current stimulation: State of the art 2008. *Brain Stimul*. 2008 Jul;1(3):206–23.
- 491 59. Thair H, Holloway AL, Newport R, Smith AD. Transcranial Direct Current Stimulation (tDCS):  
492 A Beginner’s Guide for Design and Implementation. *Front Neurosci* [Internet]. 2017 Nov 22 [cited  
493 2020 Mar 31];11. Available from: <https://www.ncbi.nlm.nih.gov/pmc/articles/PMC5702643/>
- 494 60. Balaban RS, Hampshire VA. Challenges in small animal noninvasive imaging. *ILAR J*.  
495 2001;42(3):248–62.
- 496 61. Hoyer C, Gass N, Weber-Fahr W, Sartorius A. Advantages and Challenges of Small Animal  
497 Magnetic Resonance Imaging as a Translational Tool. *NPS*. 2014;69(4):187–201.
- 498 62. Lau JC, Lerch JP, Sled JG, Henkelman RM, Evans AC, Bedell BJ. Longitudinal neuroanatomical  
499 changes determined by deformation-based morphometry in a mouse model of Alzheimer’s  
500 disease. *NeuroImage*. 2008 Aug 1;42(1):19–27.
- 501 63. Anderson RJ, Cook JJ, Delpratt N, Nouls JC, Gu B, McNamara JO, et al. Small Animal  
502 Multivariate Brain Analysis (SAMBA) - a High Throughput Pipeline with a Validation  
503 Framework. *Neuroinformatics*. 2019;17(3):451–72.
- 504 64. Tustison NJ, Avants BB, Cook PA, Zheng Y, Egan A, Yushkevich PA, et al. N4ITK: Improved  
505 N3 Bias Correction. *IEEE Transactions on Medical Imaging*. 2010 Jun;29(6):1310–20.
- 506 65. Delora A, Gonzales A, Medina CS, Mitchell A, Mohed AF, Jacobs RE, et al. A simple rapid  
507 process for semi-automated brain extraction from magnetic resonance images of the whole mouse  
508 head. *Journal of Neuroscience Methods*. 2016 Jan 15;257:185–93.

509

510

511 **Supporting information**

512 **S1 Appendix. Supplement**

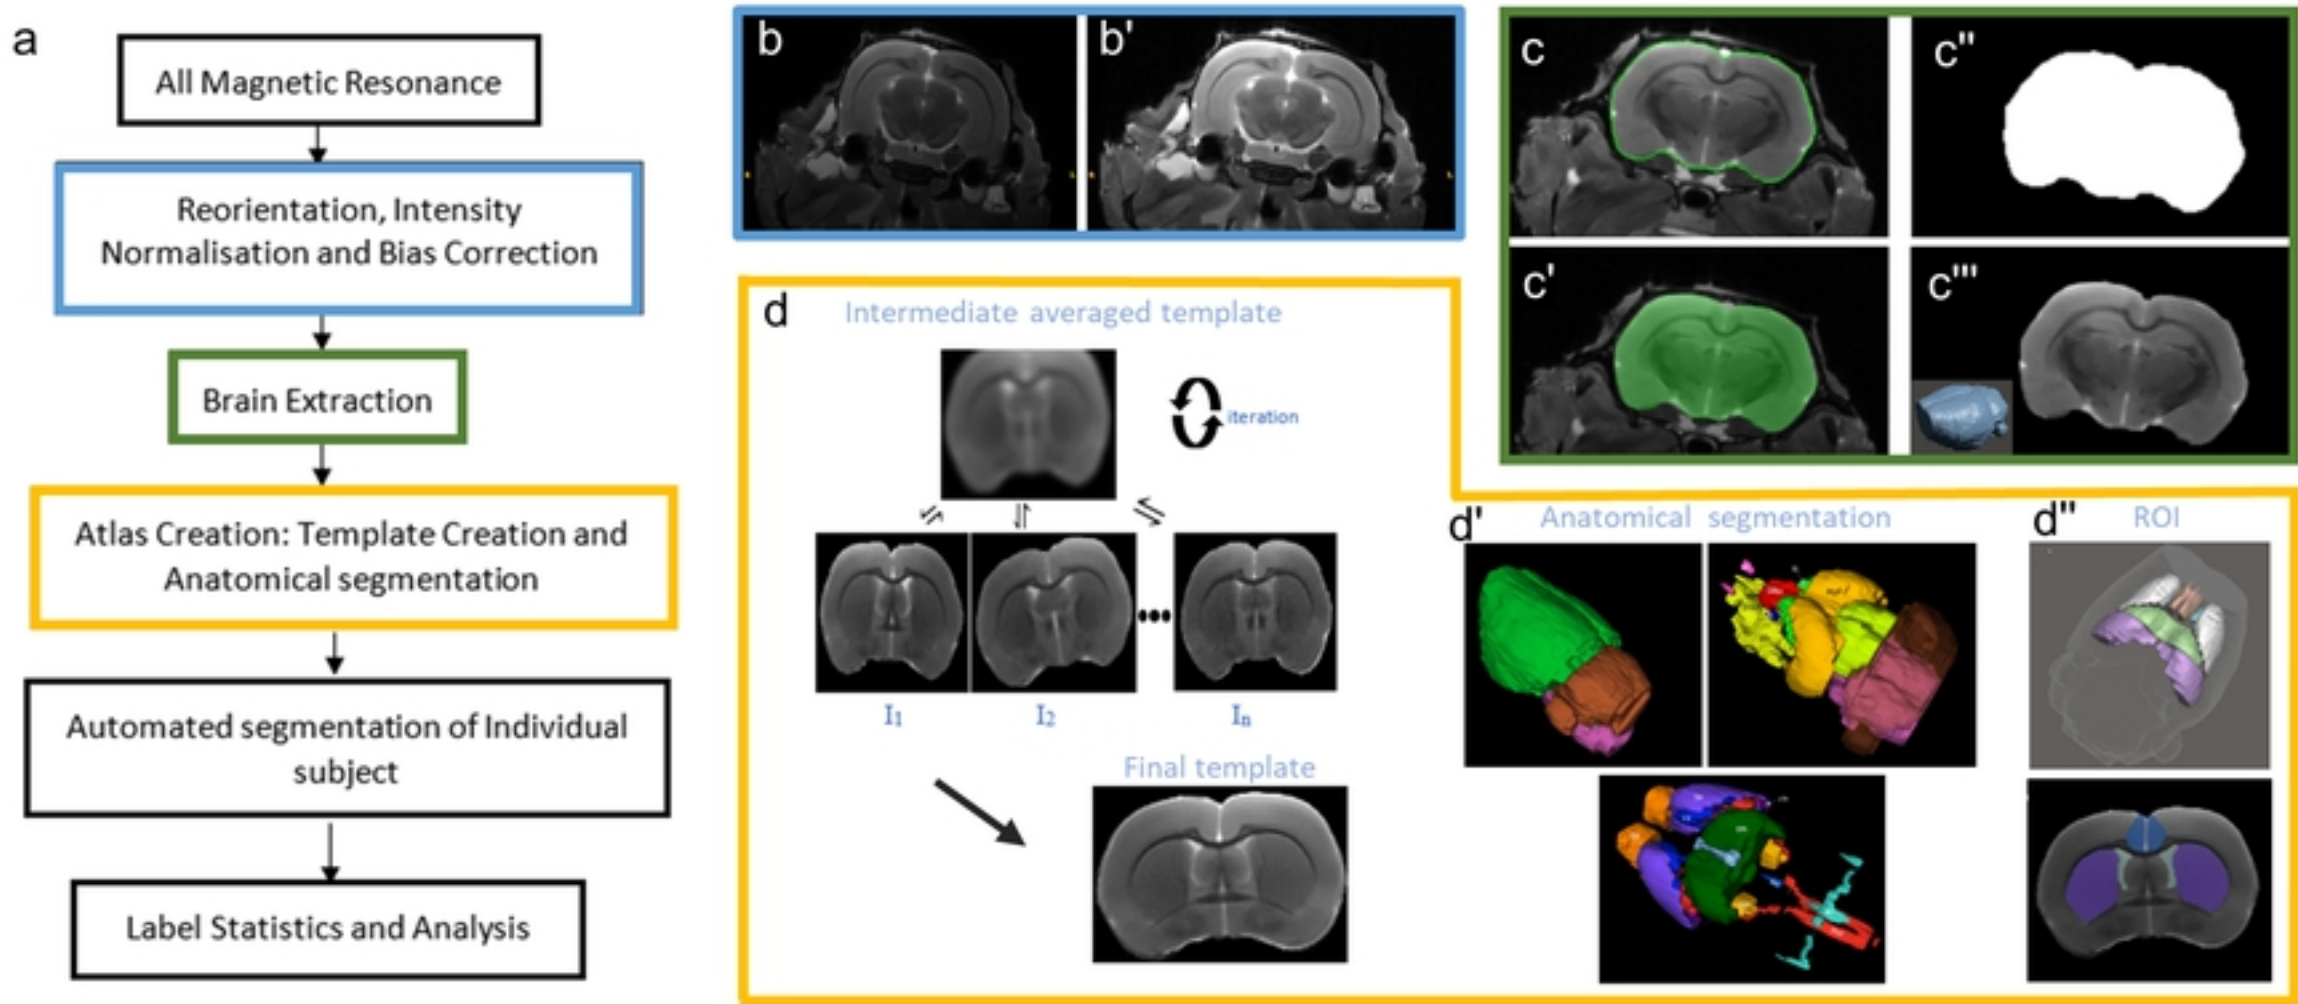

Figure

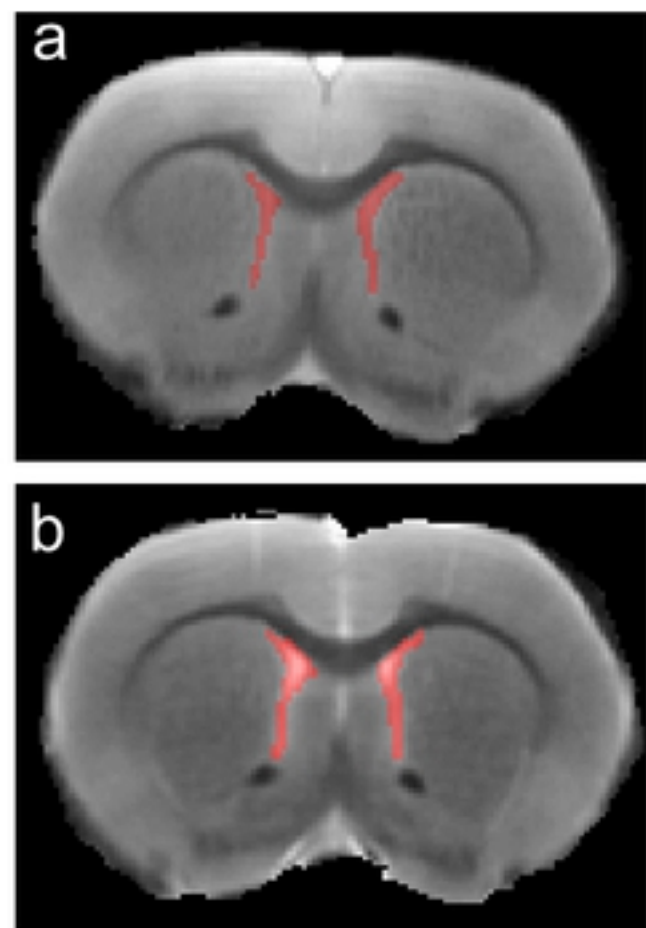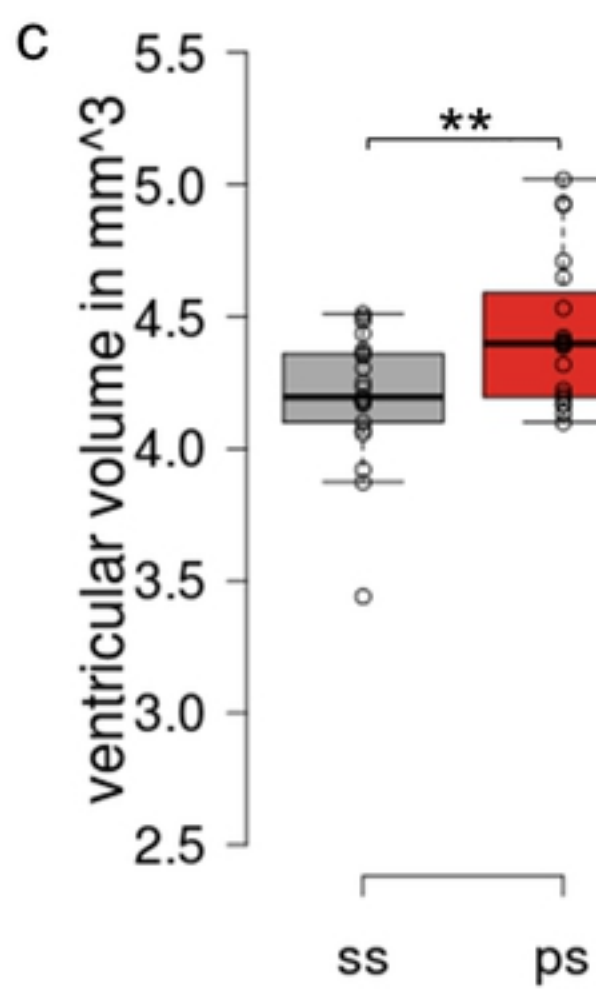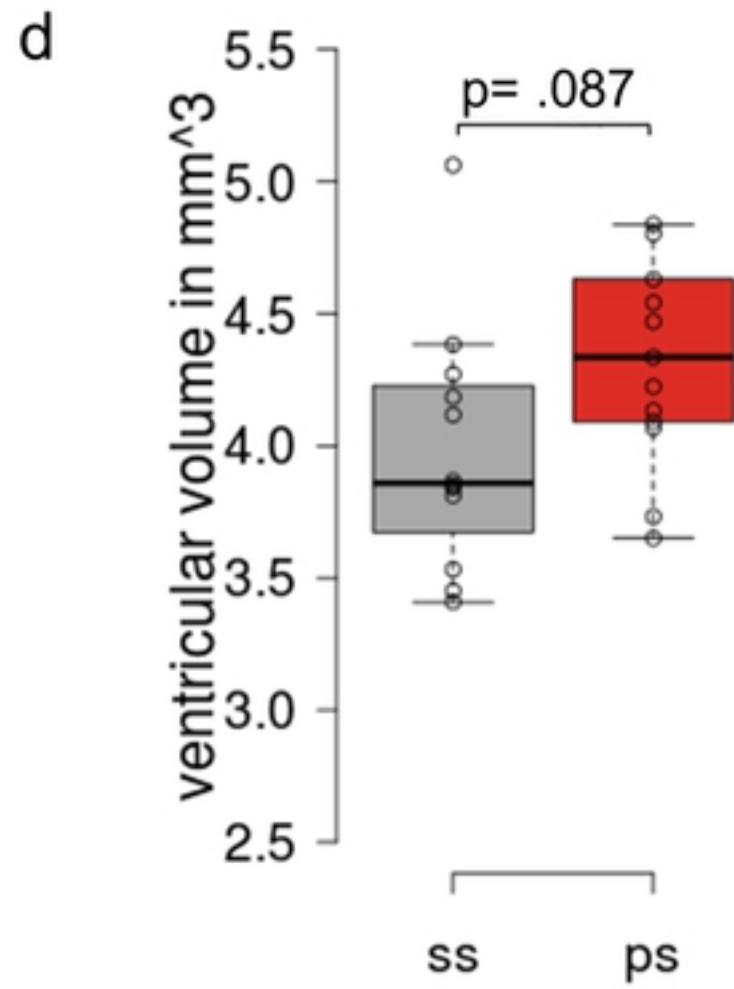

Figure

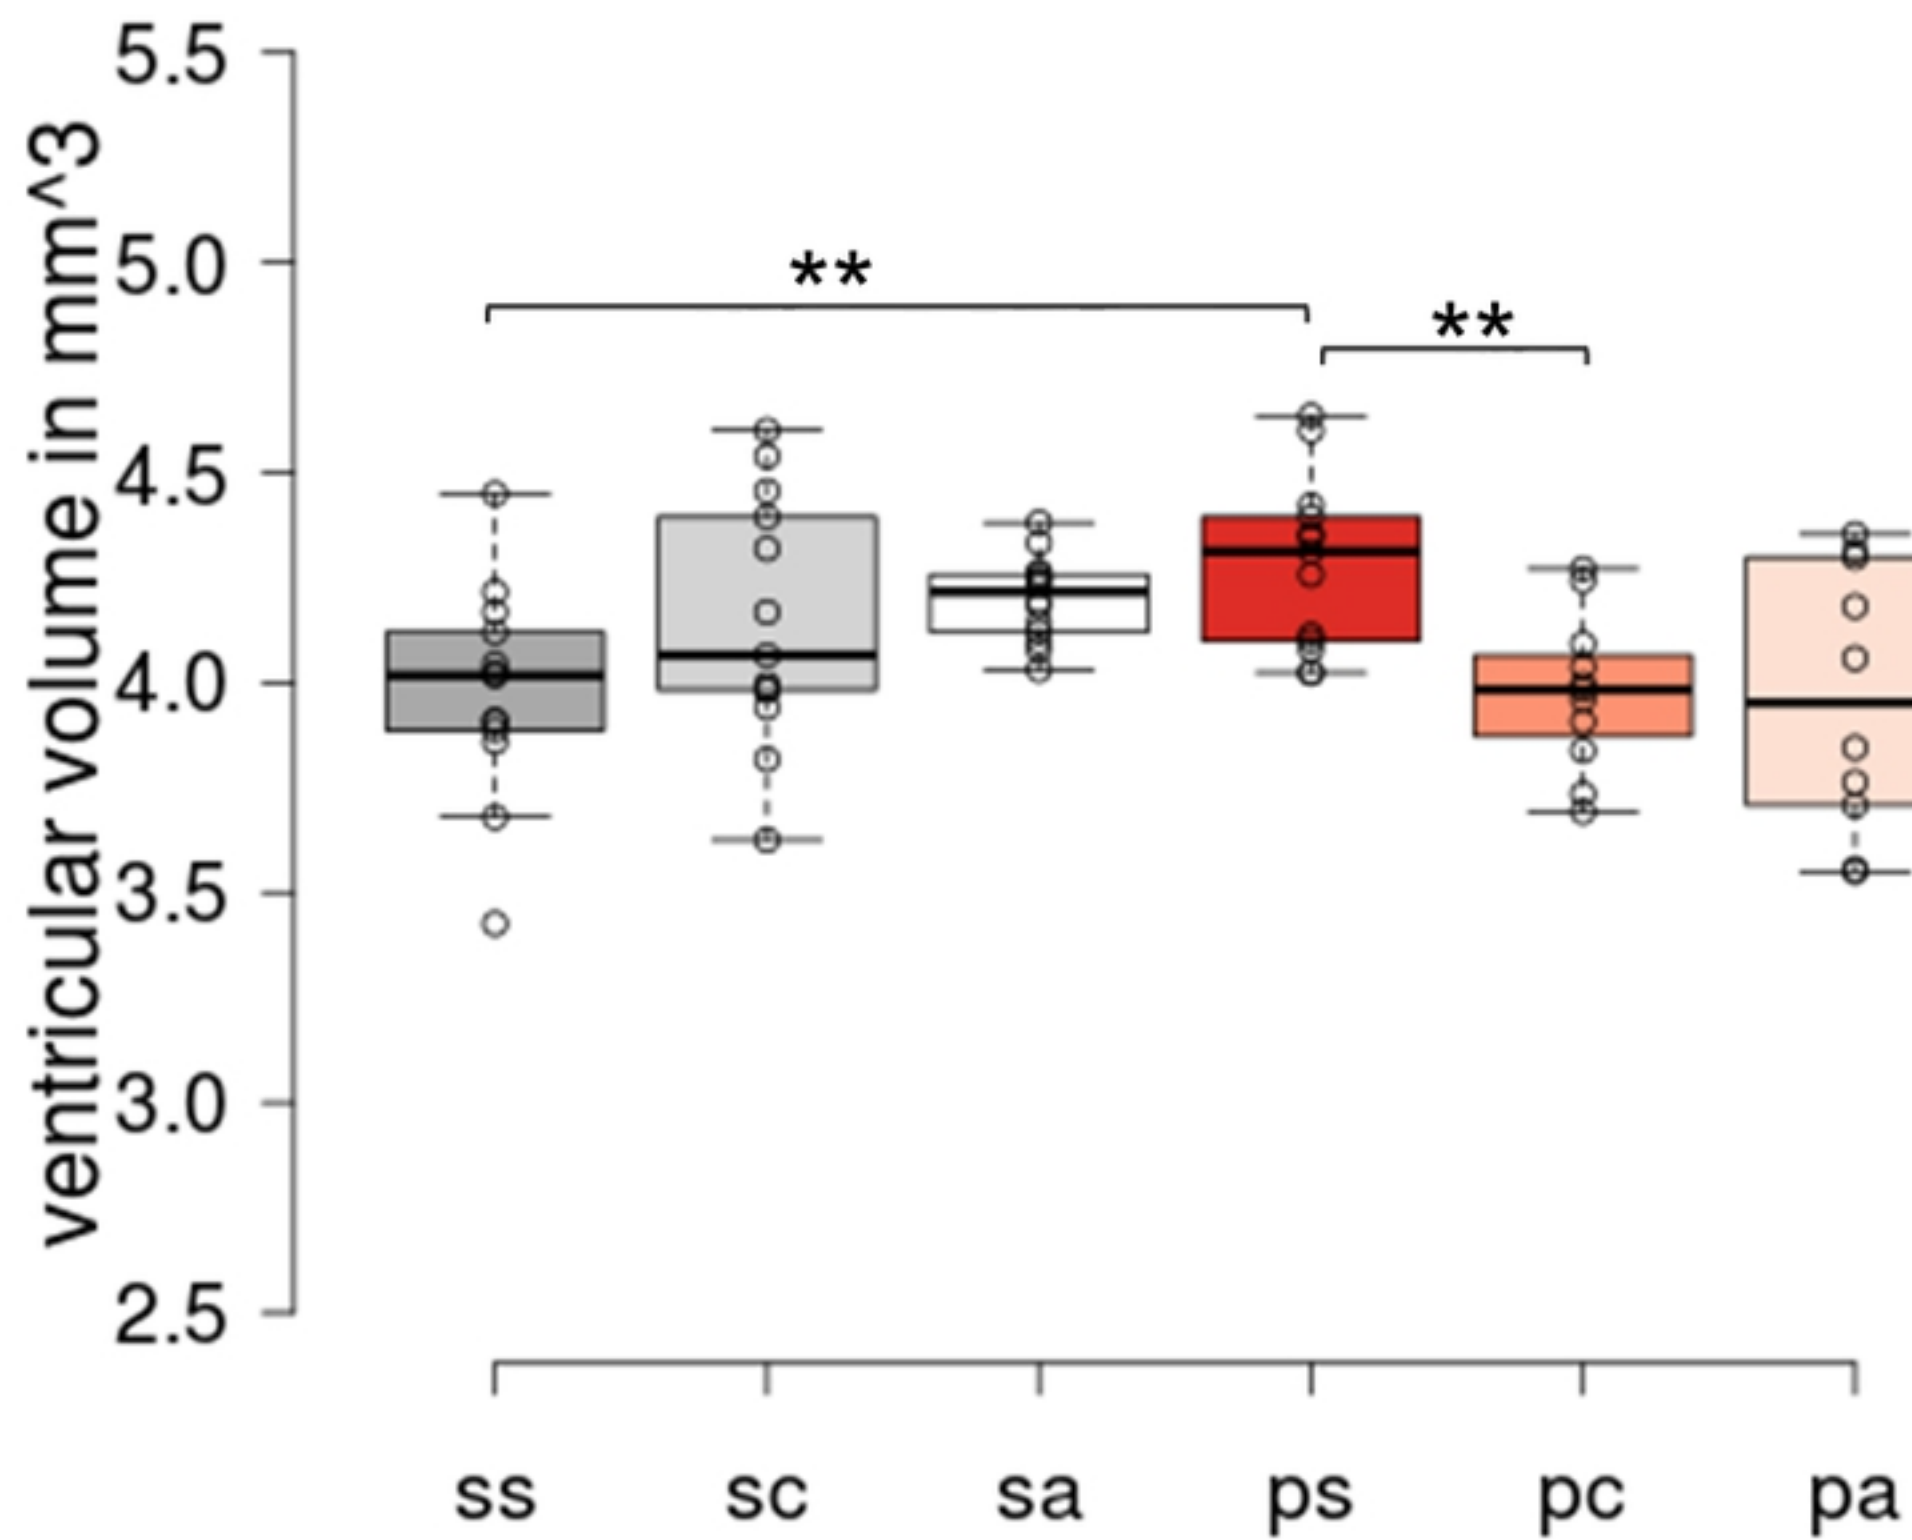

Figure
